# Supplementary material
Source: Springer Nature journal article supplement (https://www.springermedizin.de/resource/supplementary/12950_2013_351_MOESM9_ESM.pdf/9557682)

**Figure 3**

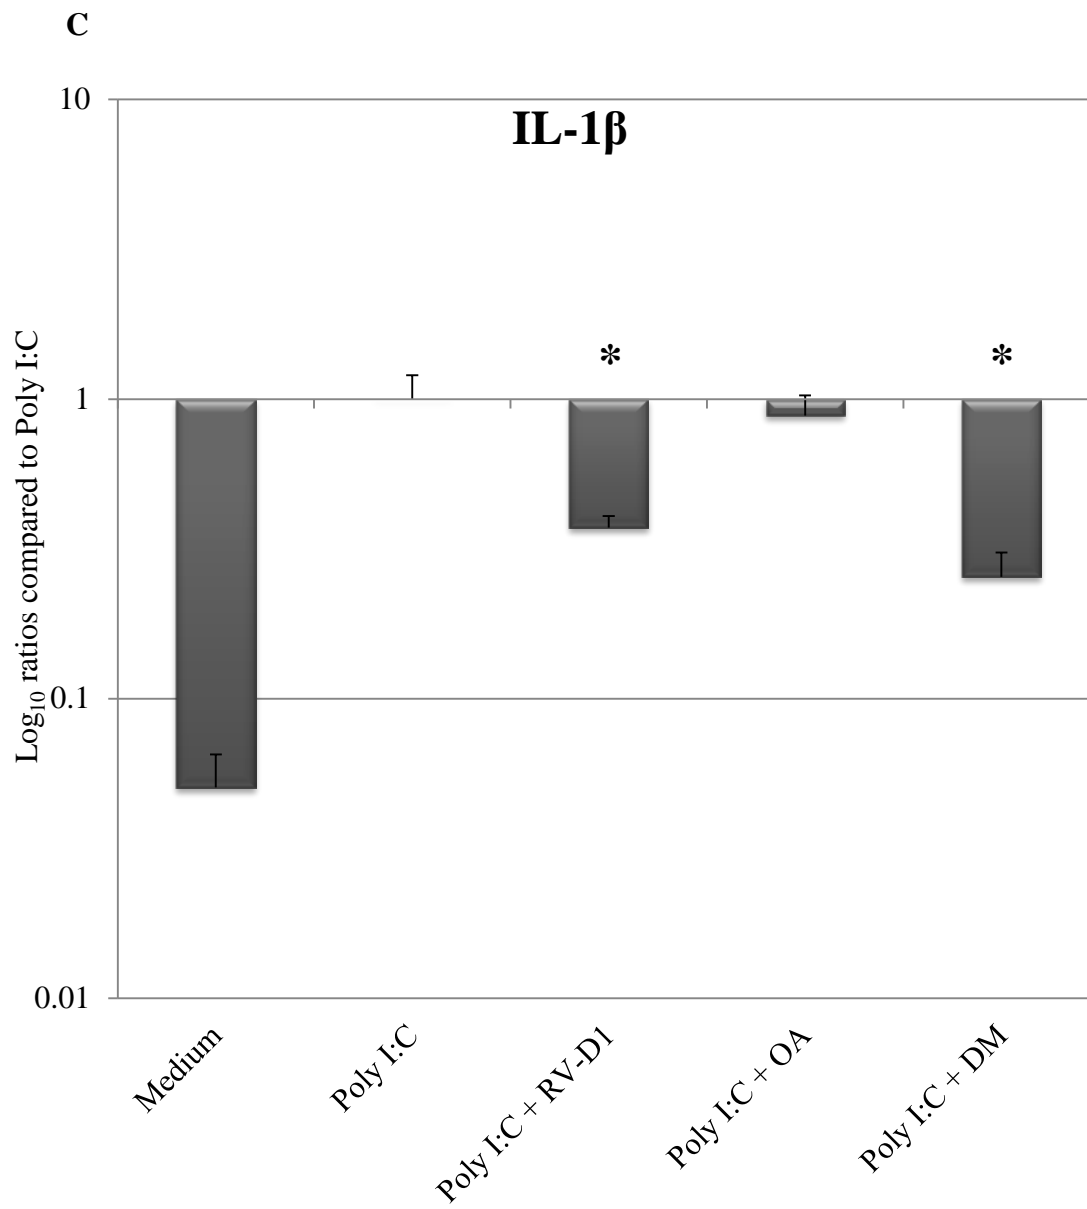

Supplement: MOESM9 [file 9557682]
